# Supplementary material
Source: PubMed Central journal article supplement (PMC7817421)
Supplement: mmc1.pdf [file mmc1.pdf]

# THE LANCET

## Digital Health

### **Supplementary appendix**

This appendix formed part of the original submission and has been peer reviewed. We post it as supplied by the authors.

Supplement to: Rader B, White LF, Burns MR, et al. Mask-wearing and control of SARS-CoV-2 transmission in the USA: a cross-sectional study. *Lancet Digit Health* 2021; published online Jan 19. [https://doi.org/10.1016/S2589-7500\(20\)30293-4](https://doi.org/10.1016/S2589-7500(20)30293-4).

## Supplementary Materials

**Figure S1. Mask Wearing, Social Contacts and the Predicted Probability of  $R_t$  below 1**

Projected values from a logistic regression model measuring the association of community transmission control ( $R_t < 1$ ) with mask-wearing and social contacts in US states adjusting for population density, percent races other than white and a time trend (Model 1). The number of self-reported contacts at “social gatherings” from Facebook’s COVID-19 symptom survey was aggregated over each week and state utilizing a weighted sampling scheme.

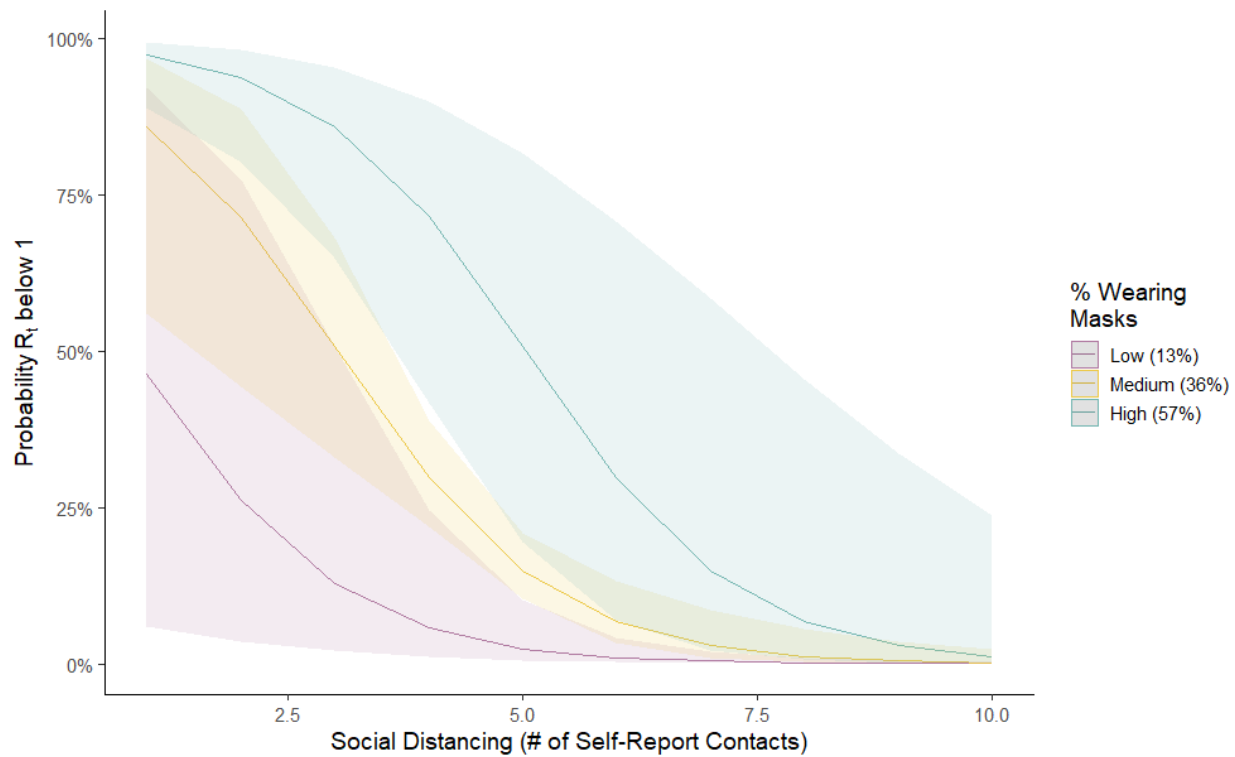

**Figure S2. Association of mask wearing with  $R_t$  at different dichotomization cutoffs**

Results from a logistic regression model measuring the association of community transmission control ( $R_t < x$ ) with mask-wearing adjusting for social distancing, population density, percent races other than white and a time trend. Model was repeated as cutoff for  $R_t$  dichotomization ( $x$ ) was varied. The odds ratio (point) and 95% confidence interval (-) for mask wearing that resulted from each iteration is shown.

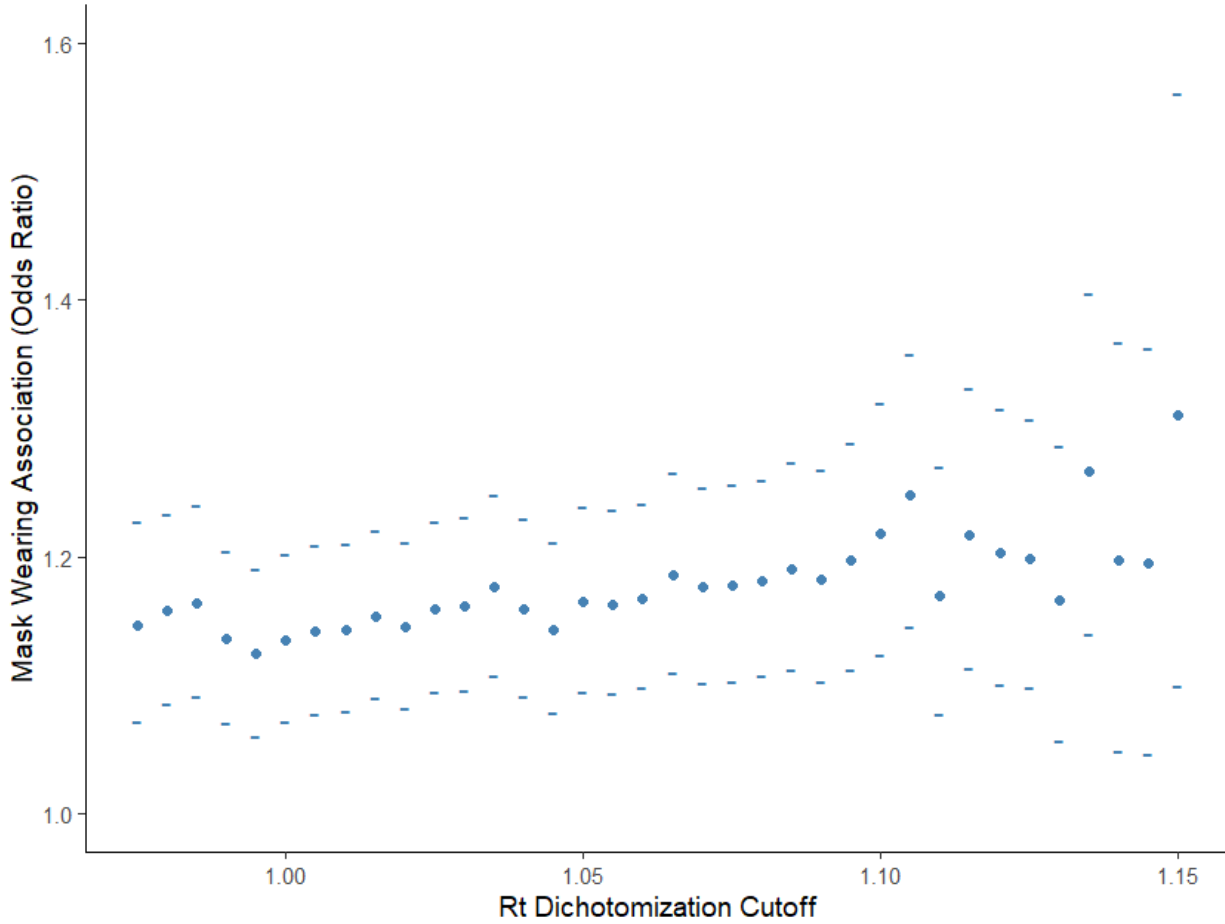

**Figure S3. Association of mask wearing with categorical  $R_t$**

Projected probabilities from an ordinal logistic regression model measuring the association of community transmission control ( $R_t$ ) with mask-wearing adjusting for social distancing, population density, percent races other than white and a time trend. Observed mask wearing was between 8.1%-73.7%.

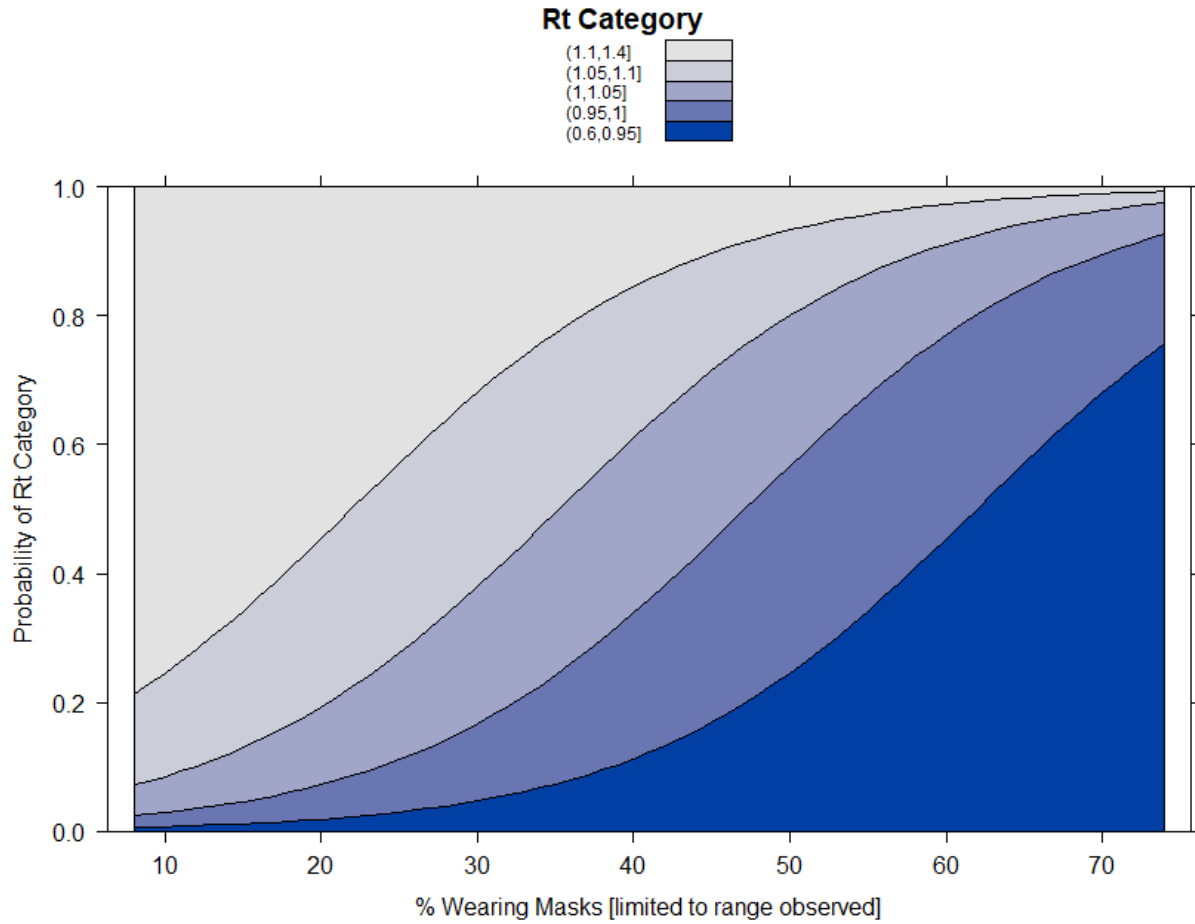

## **Supplementary Methods**

### **Weighted Variable of Mask Wearing:**

We assigned the below values to individuals according to the four-point Likert scale for reported mask wearing while at the grocery store or with family/friends. We then averaged across both conditions. For example, an individual who said they would be very likely to wear a mask with family and friends, but not so likely to wear one to the grocery store would receive a score of .625.

Very Likely: .95  
Somewhat Likely: .6  
Not So Likely: .3  
Not Likely at All: .05

**The seven models presented in table 2 and the additional modeling frameworks are described:**

Model 1. Generalized linear model with a logit link function:

$$\ln \left( \frac{(Y_{ij} = R_t < cut|x_{ij})}{1 - p(Y_{ij} = R_t < cut|x_{ij})} \right) = \beta_0 + \beta_1 mask_{ij} + \beta_2 dist_{ij} + \beta_3 nonwhite_{ij} + \beta_4 density_i$$

With variables defined in the following fashion:

$i$  = State,  $j$  = Week

$R_t$  = Instantaneous reproductive number as measured by rt.live

$cut$  = dichotomization threshold, set to the  $R_t$  critical value of 1

$mask$  = Mask wearing defined percentage of respondents who replied “very likely” to mask while with family and friends and at the grocery store

$dist$  = Social distancing defined as percentage change from baseline via google community mobility

$nonwhite$  = Percentage of survey respondents who self-identify as a race other than white

$density$  = Population density as measured by 1000 people per square kilometer

Model 2: Replication of model 1 with the  $mask$  and  $nonwhite$  terms being weighted according to the SurveyMonkey weighting scheme.

Model 3: Replication of model 1 but defining  $R_t$  as the instantaneous reproductive number measured by epiforecasts.io

Model 4: Replication of model 1 but defining  $mask$  as the percentage of respondents who replied “very likely” to mask while with family and friends

Model 5: Replication of model 1 but defining  $mask$  as the percentage of respondents who replied “very likely” to mask at the grocery store

Model 6: Replication of model 1 with the addition of the following term:

$$+ \beta_5 peak\_rt_i$$

$peak\_rt$  defined as the peak observed  $R_t$  from March-May 2020 as measured by rt.live for each state ( $i$ )

Model 7: Replication of model 1 with the addition of the following term:

$$+ \beta_5 mask_{ij} * dist_{ij}$$

Figure S1: Replication of model 1 but defining  $dist$  as the number of self-reported contacts at “social gatherings” (censored outlier responses) utilizing Facebook’s survey and weighted sampling scheme

Figure S2: Replication of model 1 but varying  $cut$  sequentially from .975 to 1.15 with .005 breaks

Figure S3 (ordinal logistic regression) : same covariates as are in model 1, but  $R_t$  defined as an ordinal variable:

Category 1: (0.6,0.95]

Category 2: (0.95,1]

Category 3: (1,1.05]

Category 5: (1.05,1.1]

Category 6: (1.1,1.4]

Mixed Model: same covariates as are in model 1, but a random intercept for state ( $i$ ) included
